# Supplementary material for: Characterization of a novel reassortant H5N6 highly pathogenic avian influenza virus clade 2.3.4.4 in Korea, 2017
Source: PubMed Central journal article supplement (PMC5997646; doi:10.1038/s41426-018-0104-3), 2018-06-13

# Supplementary Fig S2. (A) PB2

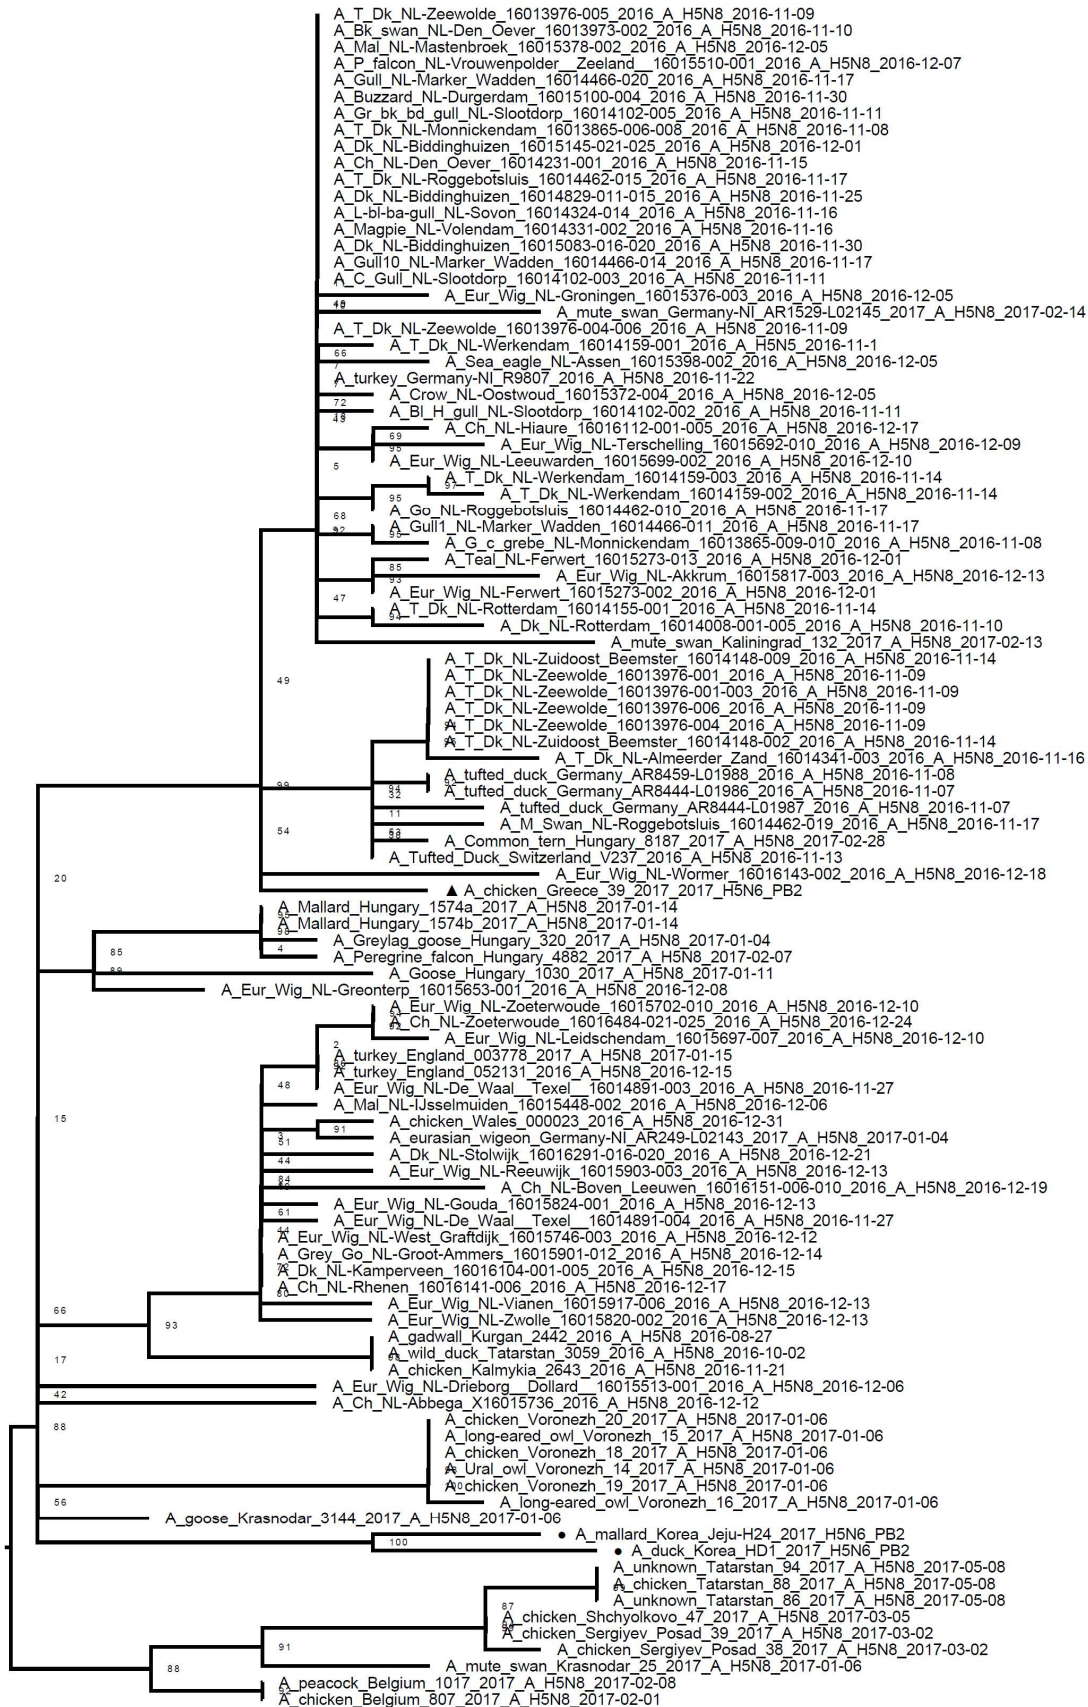

# Supplementary Fig S2. (B) PB1

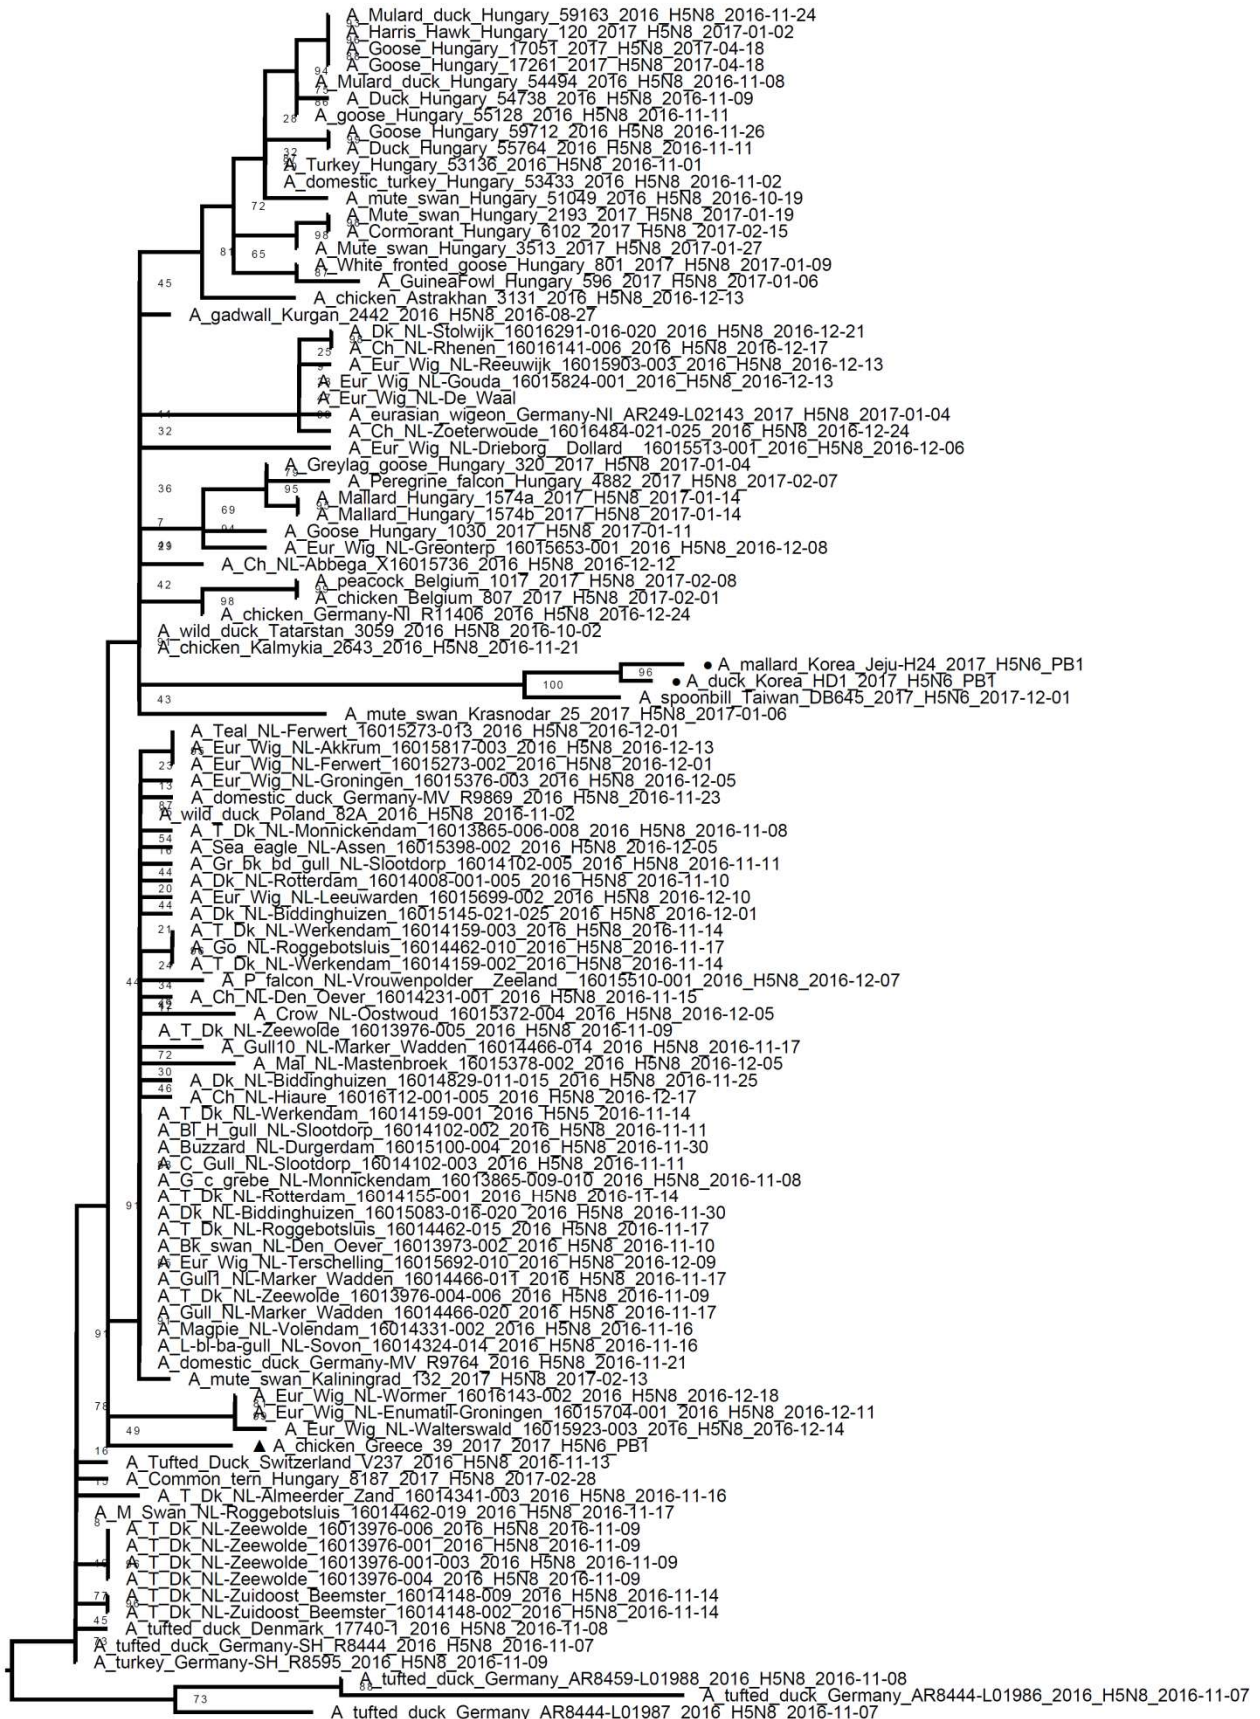

0.0020



# Supplementary Fig S2. (C) PA

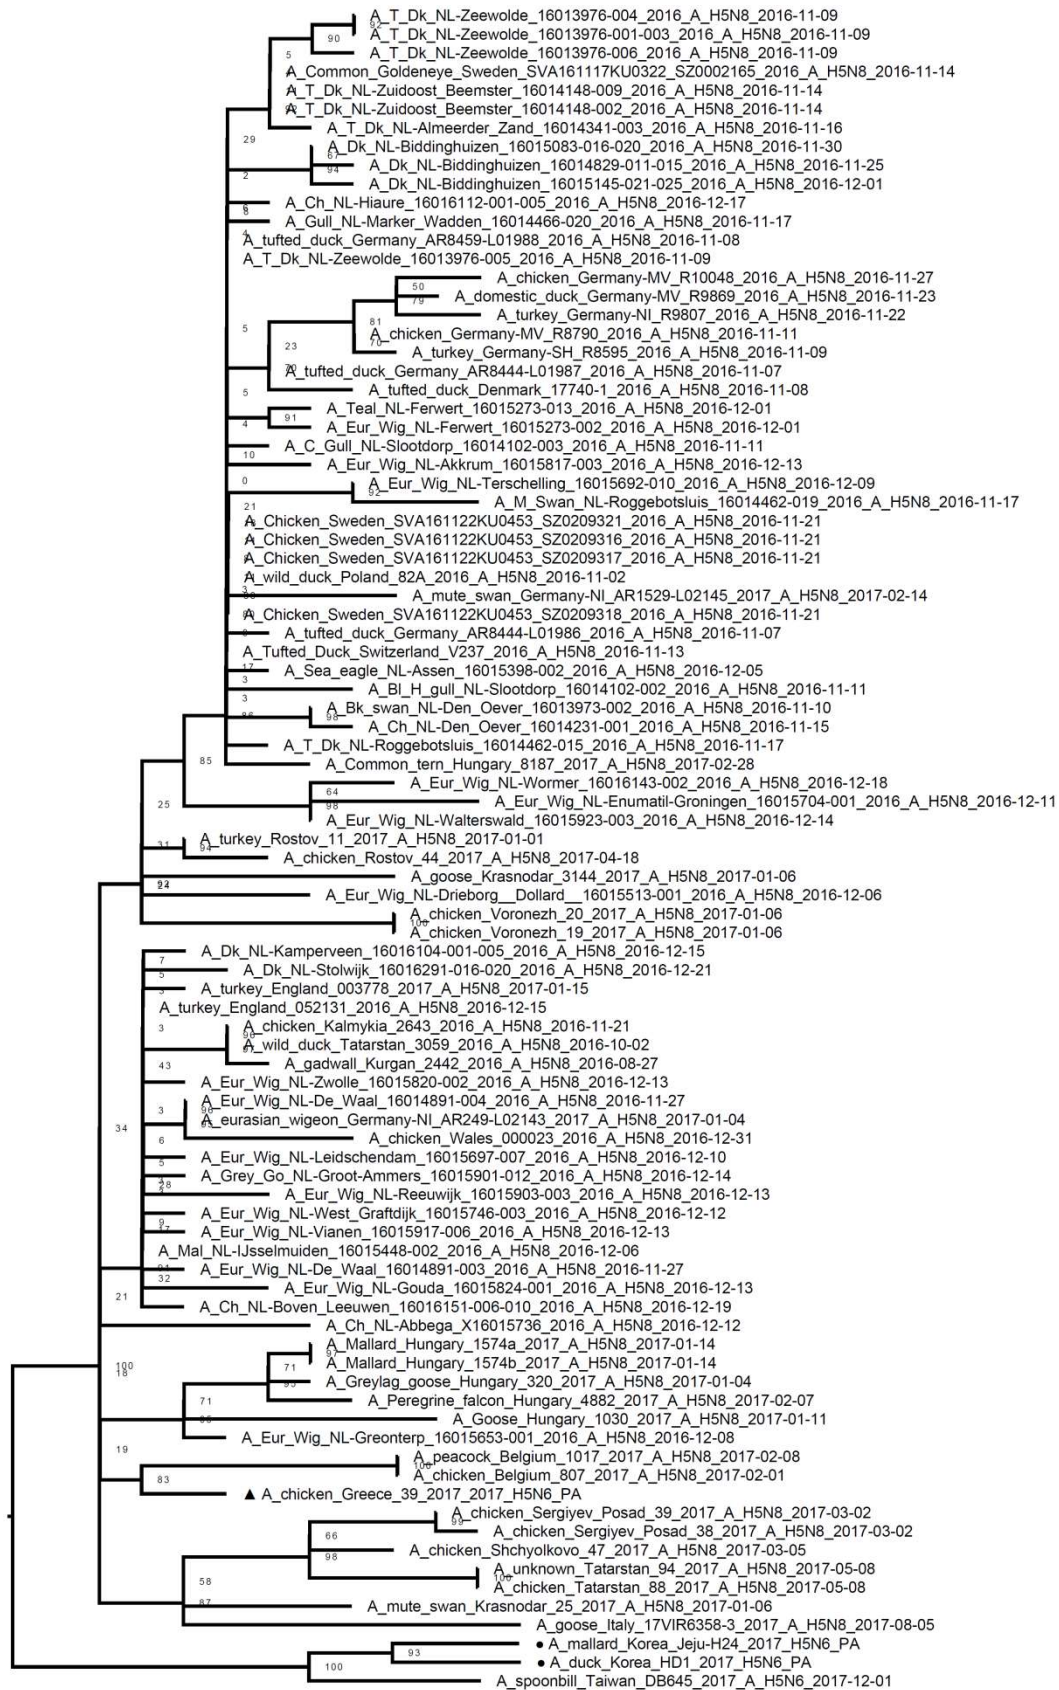

0.0010

# Supplementary Fig S2. (D) HA

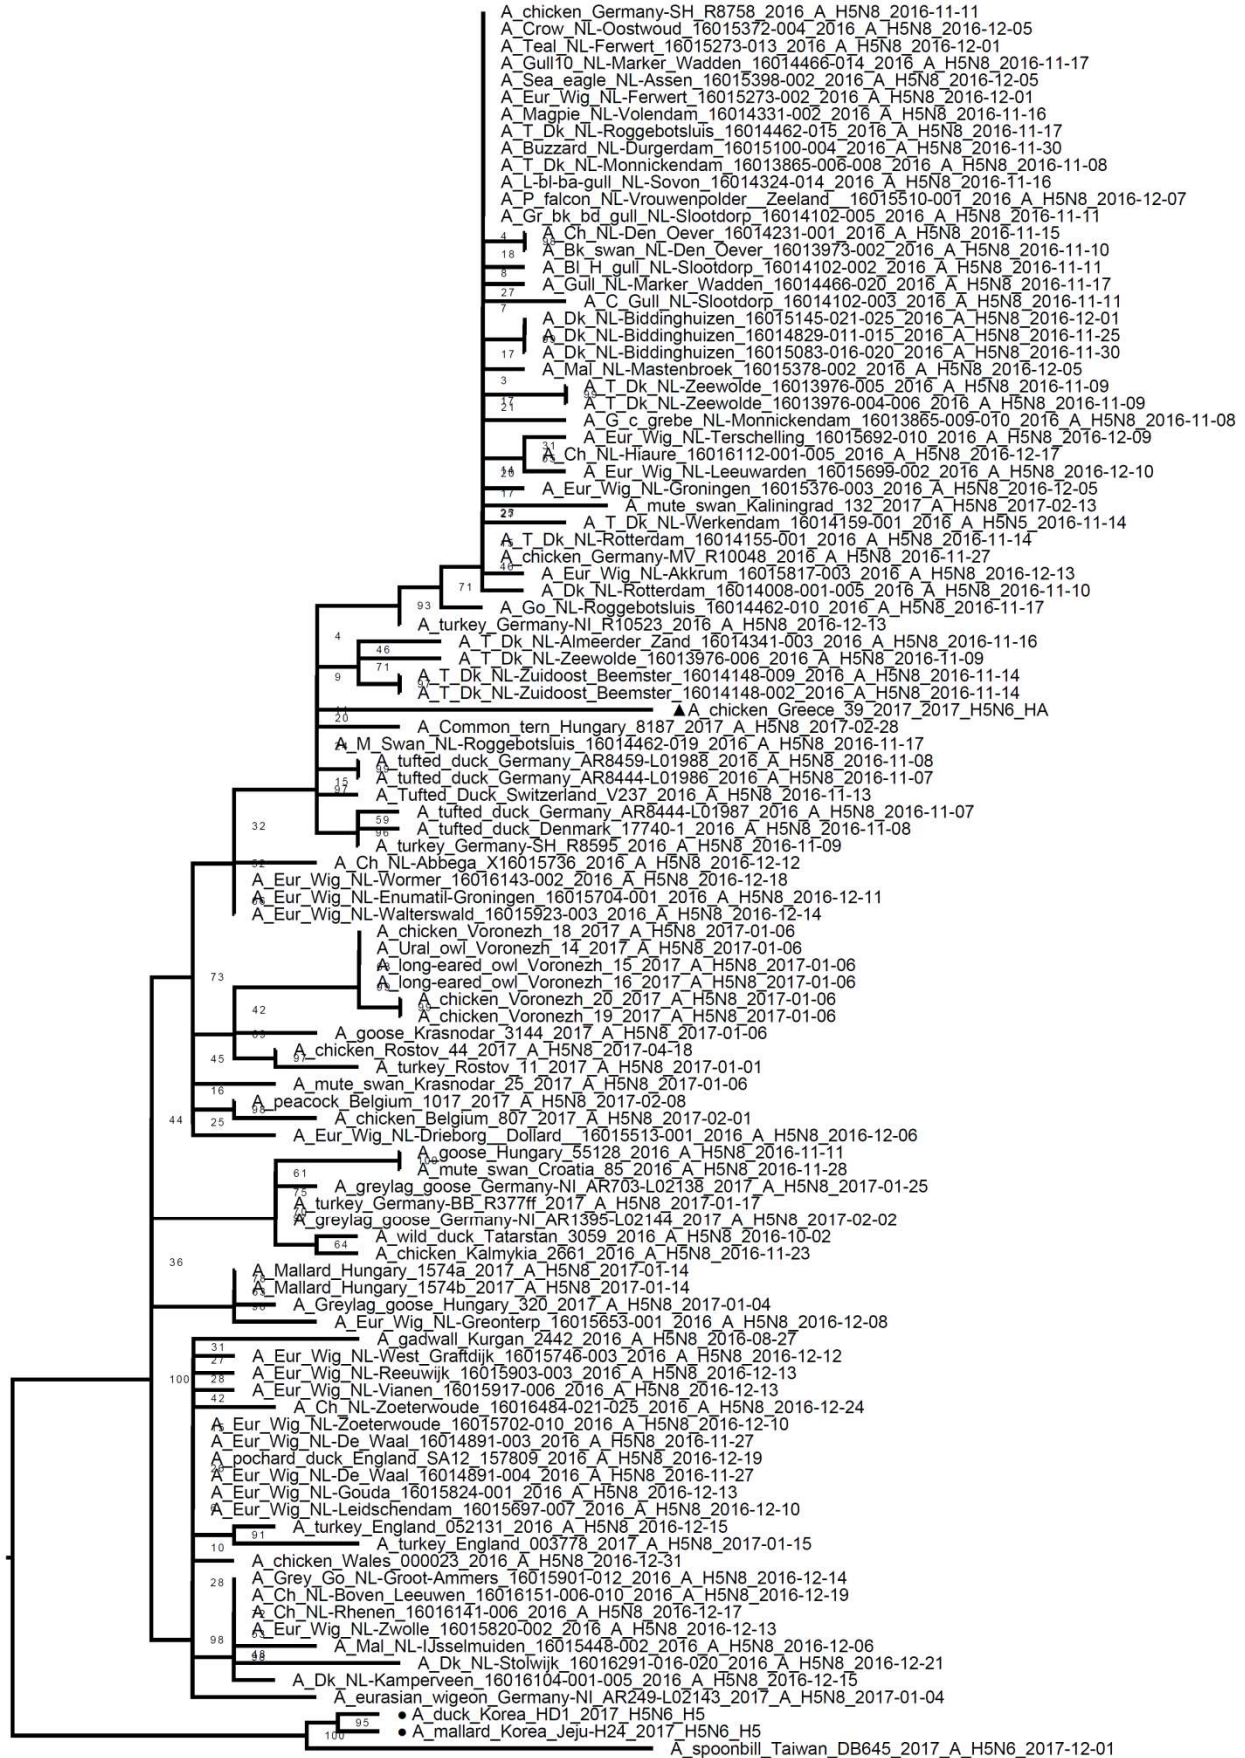

0.0020



# Supplementary Fig S2. (E) NP

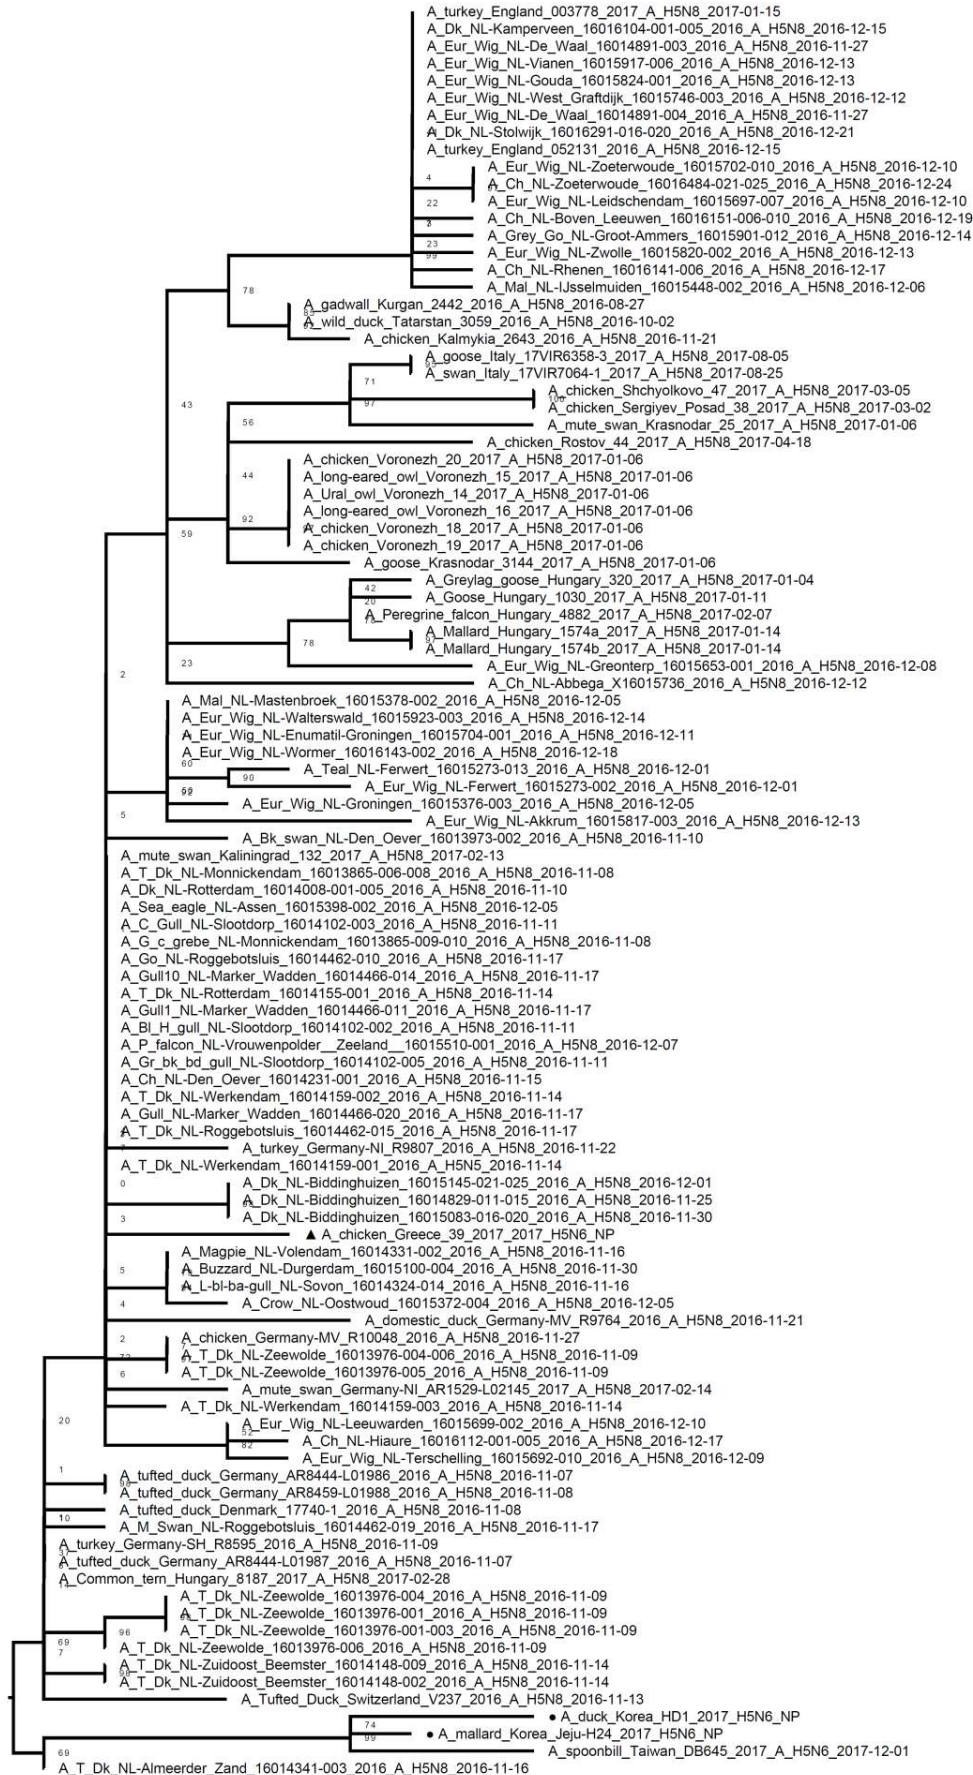

0.0010

# Supplementary Fig S2. (F) NA

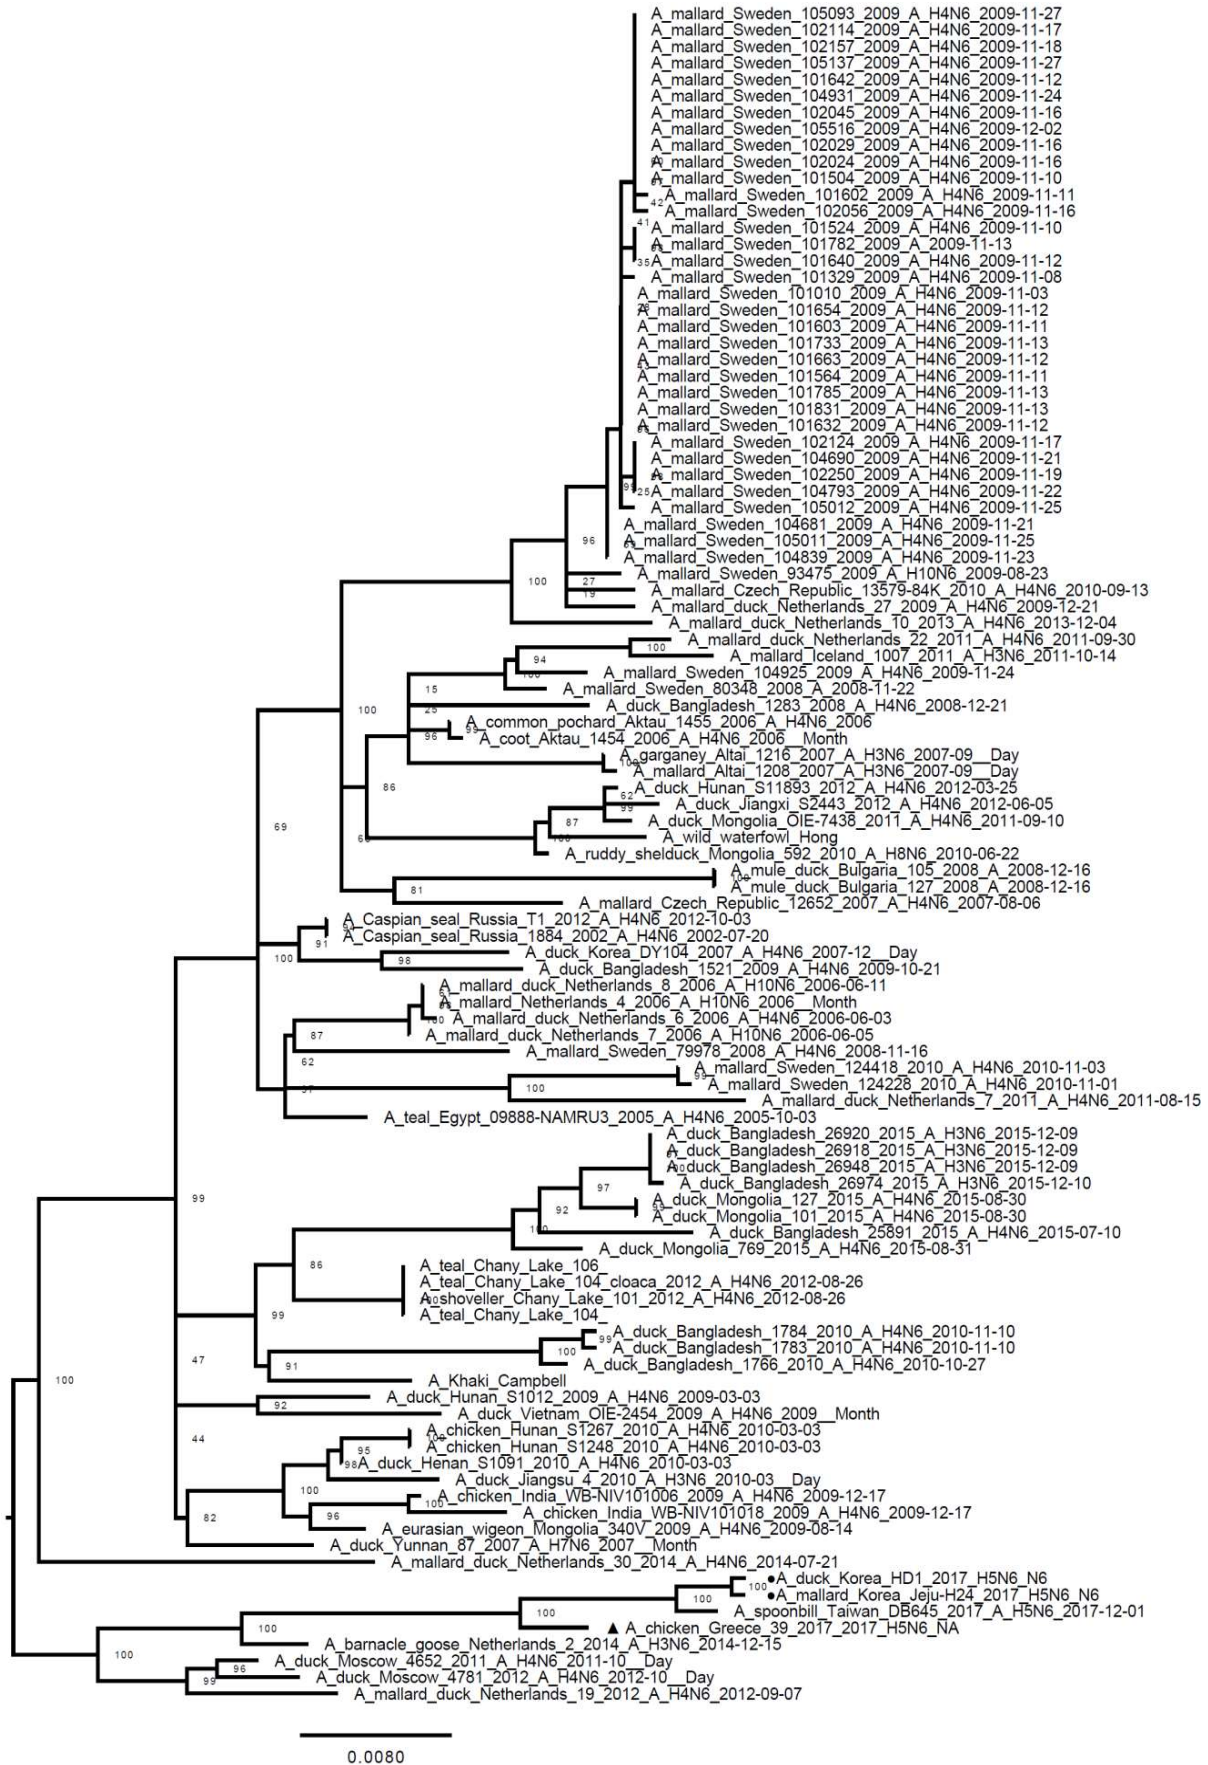



# Supplementary Fig S2. (G) M

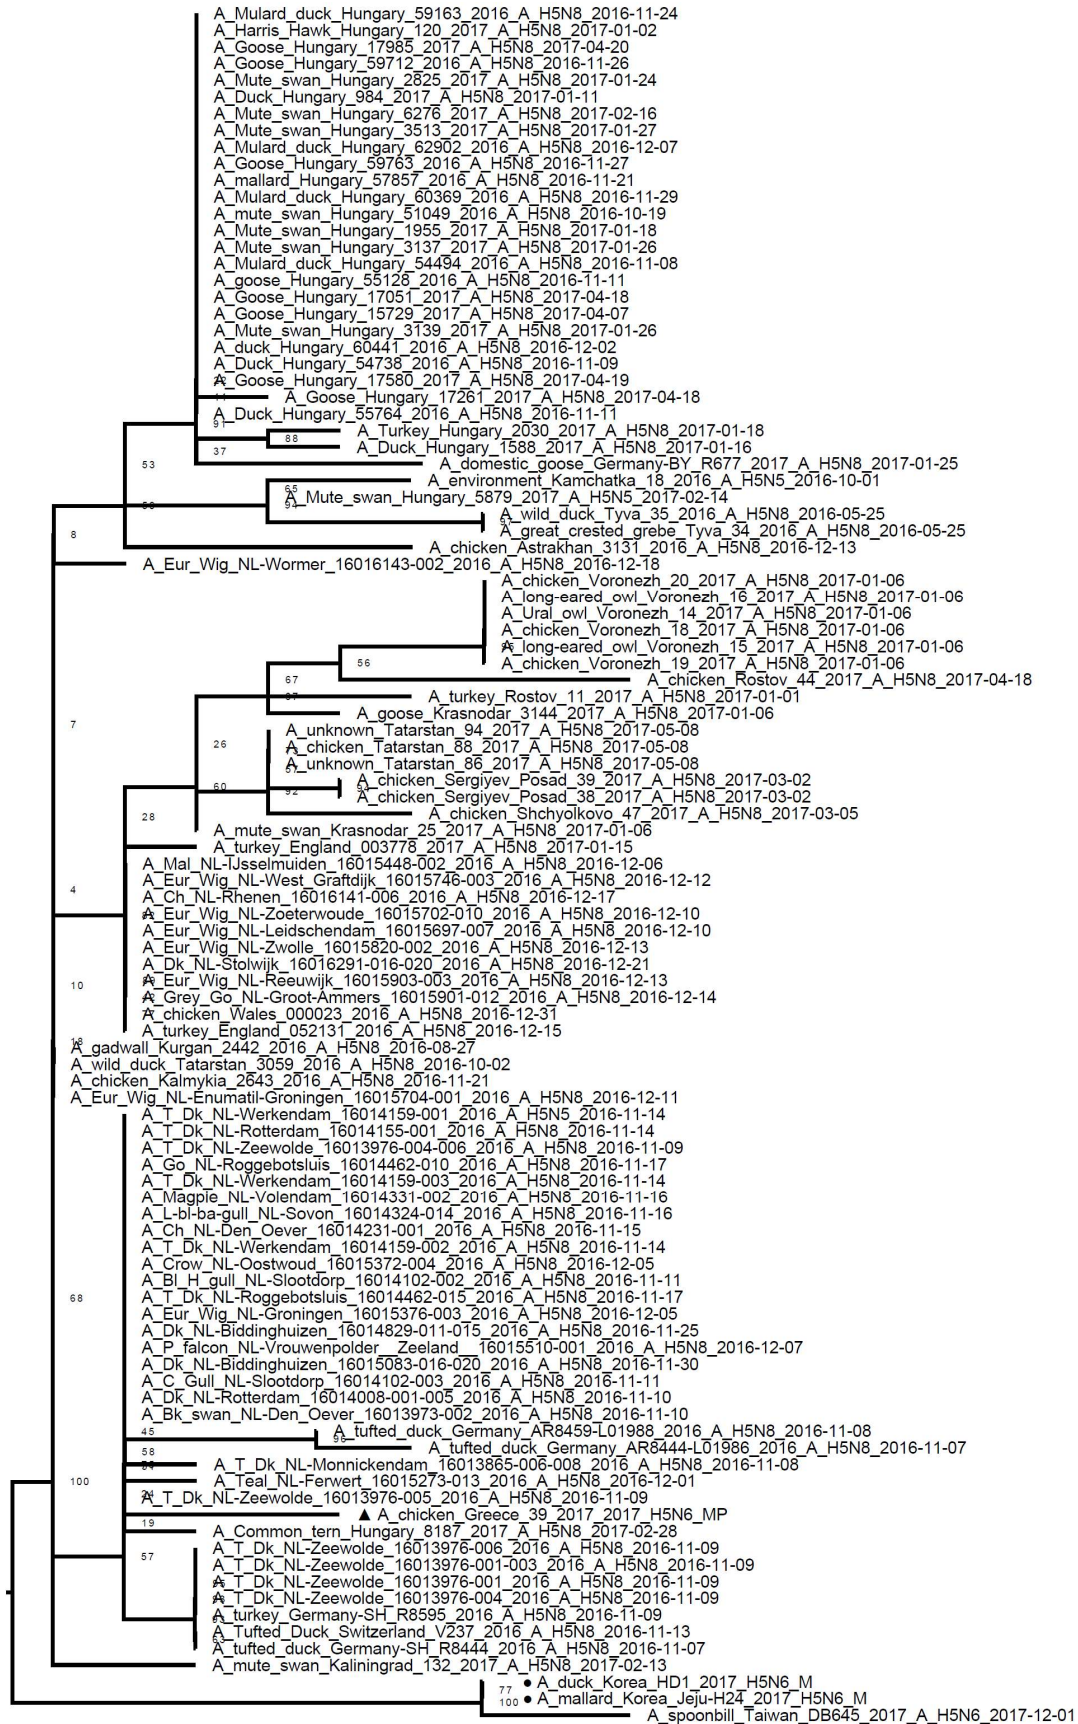

0.0020

# Supplementary Fig S2. (H) NS

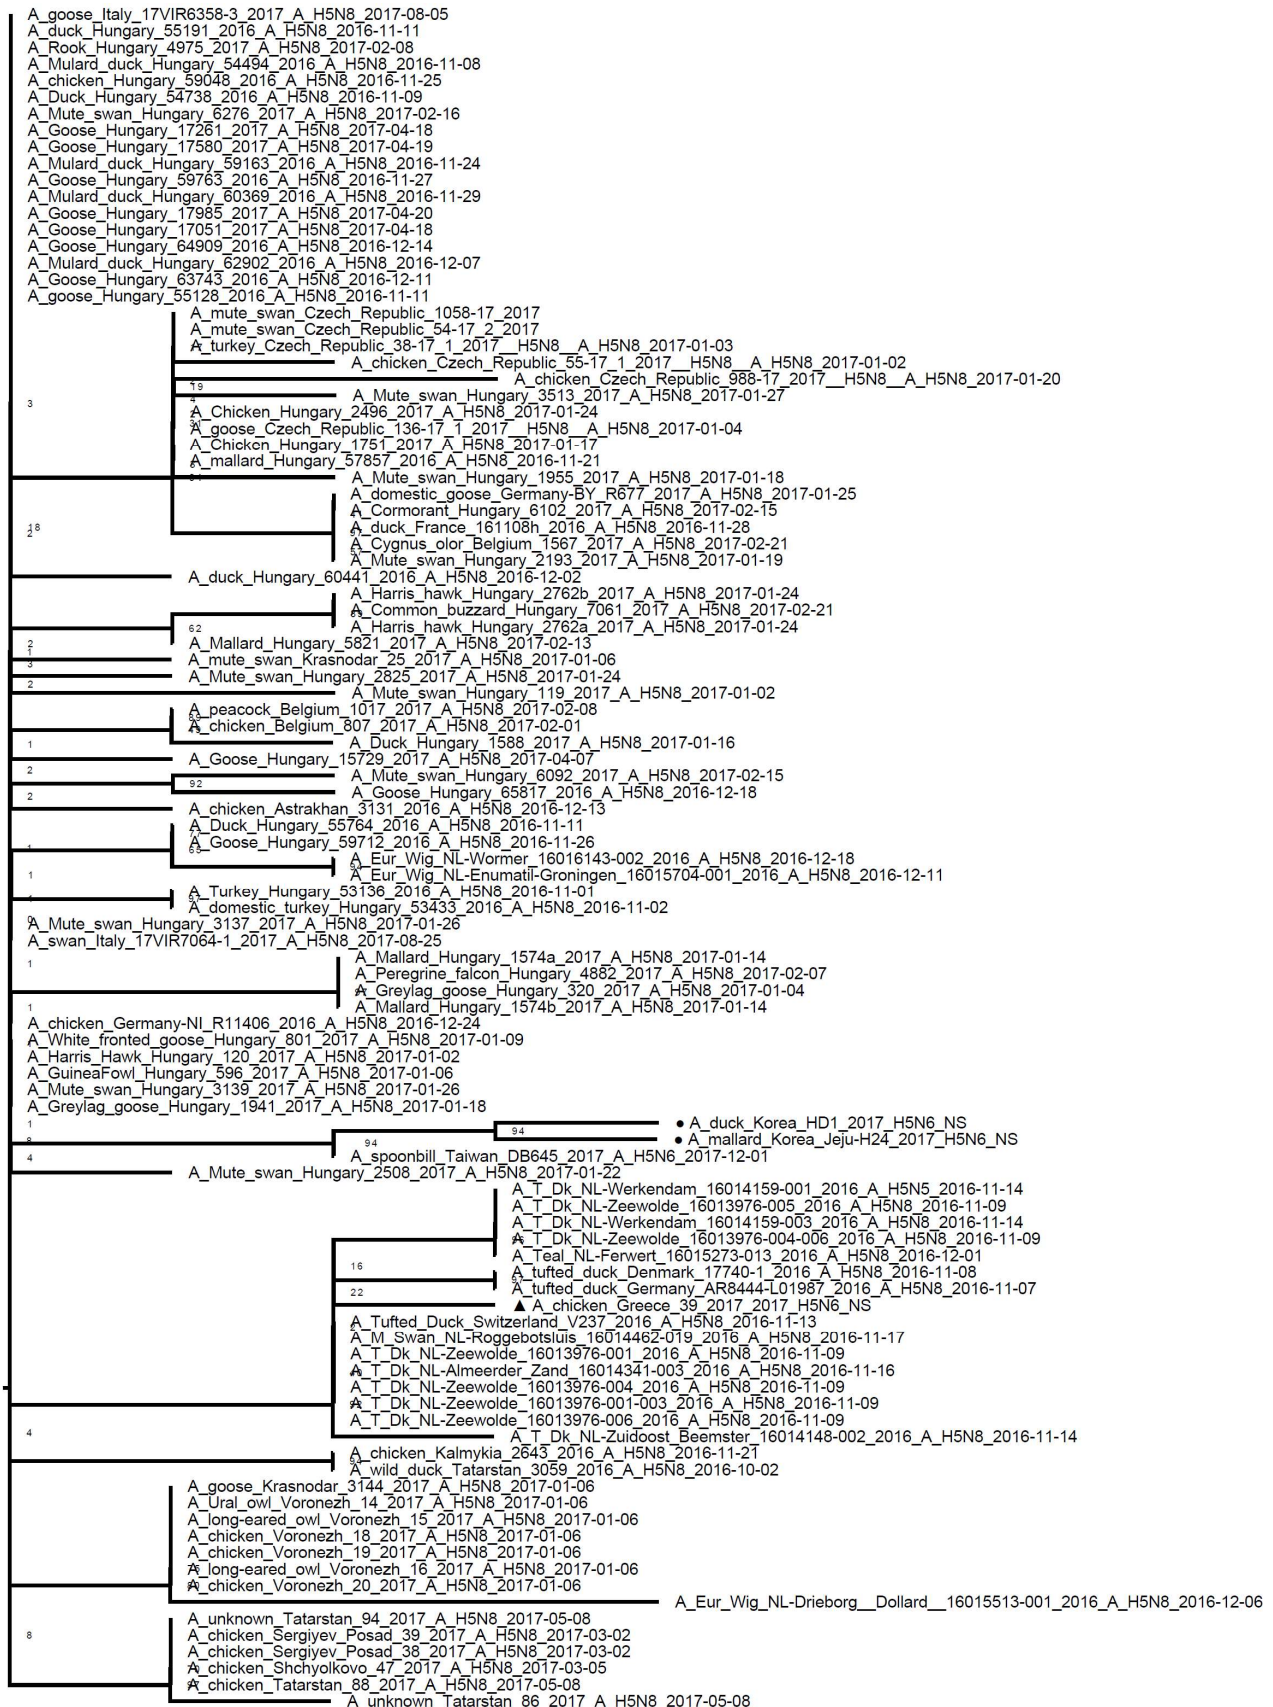

Supplement: 41426_2018_104_MOESM3_ESM.pdf [file 41426_2018_104_MOESM3_ESM.pdf]
