# Supplementary material for: Characterization of a novel reassortant H5N6 highly pathogenic avian influenza virus clade 2.3.4.4 in Korea, 2017
Source: PubMed Central journal article supplement (PMC5997646; doi:10.1038/s41426-018-0104-3), 2018-06-13
Supplement: 41426_2018_104_MOESM4_ESM.pdf [file 41426_2018_104_MOESM4_ESM.pdf]

**Supplementary table S1. (A) HA sequence information of H5 viruses for phylogenetic analysis.**

| Data source | Accession No. | Taxname                                           |
|-------------|---------------|---------------------------------------------------|
| GISAID*     | EPI866093     | A/duck/Korea/ES2/2016(H5N6)                       |
| GISAID      | EPI866132     | A/mandarin_duck/Korea/WB246/2016(H5N6)            |
| GISAID      | EPI866085     | A/chicken/Korea/HN1/2016(H5N6)                    |
| GISAID      | EPI509698     | A/breeder_duck/Korea/Gochang1/2014_H5N8           |
| GISAID      | EPI509704     | A/broiler_duck/Korea/Buan2/2014_H5N8              |
| GISAID      | EPI509709     | A/baikal_teal/Korea/Donglim3/2014_H5N8            |
| GISAID      | EPI573221     | A/broiler_duck/Korea/H1731/2014_H5N8              |
| GISAID      | EPI573239     | A/mallard/Korea/H1924-6/2014_H5N8                 |
| GISAID      | EPI837542     | A/mallard/Korea/H2102/2015_H5N8                   |
| GISAID      | EPI760026     | A/duck/Guangdong/01.01_SZSGXJK005-Y/2016_H5N6     |
| GISAID      | EPI660303     | A/goose/Guangdong/04.22_DGCP120-P/2015(H5N6)      |
| GISAID      | EPI657578     | A/chicken/Jiangxi/12.05_NCDZT0032/2014(H5N6)      |
| GISAID      | EPI599353     | A/duck/Jiangxi/10160/2014_H5N6                    |
| GISAID      | EPI661903     | A/chicken/Guangxi/04.10_NM140/2015(H5N6)          |
| GISAID      | EPI599285     | A/chicken/Shenzhen/433/2013_H5N6                  |
| GISAID      | EPI590891     | A/duck/Sichuan/NCJPL7/2014_H5N6                   |
| GISAID      | EPI658951     | A/duck/Hunan/02.07_YYFQH026-O/2015(H5N6)          |
| GISAID      | EPI585724     | A/cat/Sichuan/SC18/2014_H5N6                      |
| GISAID      | EPI517161     | A/Chicken/Kumamoto/1-7/2014_H5N8                  |
| GISAID      | EPI548493     | A/duck/Chiba/26-372-61/2014_H5N8                  |
| GISAID      | EPI553343     | A/chicken/Miyazaki/7/2014_H5N8                    |
| GISAID      | EPI1028076    | A/mallard/Shanghai/SH-9/2013_H5N8                 |
| GISAID      | EPI530985     | A/duck/Zhejiang/W24/2013_H5N8                     |
| GISAID      | EPI553208     | A/crane/Kagoshima/KU1/2014_H5N8                   |
| GISAID      | EPI891535     | A/chicken/Miyazaki/2-2C/2017_H5N6                 |
| GISAID      | EPI867089     | A/muscovy_duck/Aomori/1-3T/2016_H5N6              |
| GISAID      | EPI881069     | A/chicken/Kumamoto/1-2C/2016_H5N6                 |
| GISAID      | EPI543002     | A/duck/Beijing/FS01/2014_H5N8                     |
| GISAID      | EPI703608     | A/duck/Eastern_China/S1109/2014_H5N8              |
| GISAID      | EPI442017     | A/duck/Jiangsu/k1203/2010_H5N8                    |
| GISAID      | EPI596616     | A/duck/Vietnam/LBM759/2014_H5N6                   |
| GISAID      | EPI750122     | A/goose/Taiwan/01019/2015_H5N8                    |
| GISAID      | EPI915870     | A/duck/Taiwan/1702004/2017_H5N6                   |
| GISAID      | EPI750154     | A/goose/Taiwan/01022/2015_H5N2                    |
| GISAID      | EPI926613     | A/domestic_duck/Siberia/103/2016_H5N8             |
| GISAID      | EPI773757     | A/great_crested_grebe/Uvs-Nuur_Lake/341/2016_H5N8 |
| GISAID      | EPI823756     | A/black-headed_gull/Tyva/41/2016_H5N8             |
| GISAID      | EPI836606     | A/grey_heron/Uvs-Nuur_Lake/20/2016_H5N8           |
| GISAID      | EPI858844     | A/painted_stork/India/10CA03/2016_H5N8            |
| GISAID      | EPI869927     | A/chicken/Poland/79A/2016_H5N8                    |
| GISAID      | EPI861568     | A/mute_swan/Croatia/70/2016_H5N8                  |
| GISAID      | EPI547673     | A/duck/England/36254/14_H5N8                      |
| GISAID      | EPI909364     | A/tufted_duck/Denmark/17740-1/2016_H5N8           |
| GISAID      | EPI860231     | A/wild_duck/Poland/82A/2016_H5N8                  |
| GISAID      | EPI860519     | A/goose/Hungary/55128/2016_H5N8                   |
| GISAID      | EPI774121     | A/Bar-headed_Goose/Qinghai/BTY1-LV/2016_H5N8      |
| GISAID      | EPI954575     | A/turkey/Italy/17VIR576-11/2017_H5N8              |
| GISAID      | EPI1019638    | A/Eur_Wig/NL-Zoeterwoude/16015702-010/2016_H5N8   |
| GISAID      | EPI869687     | A/decoy_duck/France/161104e/2016_H5N8             |
| GISAID      | EPI1019446    | A/Crow/NL-Oostwoud/16015372-004/2016_H5N8         |
| GISAID      | EPI861011     | A/turkey/Germany-SH/R8595/2016_H5N8               |
| GISAID      | EPI552746     | A/turkey/Germany/AR2485-86-L00899/2014_H5N8       |
| GISAID      | EPI544892     | A/duck/Shandong/Q1/2013_H5N8                      |
| GISAID      | EPI573171     | A/Chicken/Netherlands/14015824/2014_H5N8          |
| GISAID      | EPI569390     | A/gyrfalcon/Washington/41088-6/2014_H5N8          |
| GISAID      | EPI778498     | A/turkey/Minnesota/15-012582-1/2015_H5N2          |
| GISAID      | EPI542617     | A/duck/Beijing/FS01/2013_H5N8                     |
| GISAID      | EPI760089     | A/feline/Guangdong/1/2015_H5N6                    |
| GISAID      | EPI868848     | A/turkey/England/052131/2016_H5N8                 |
| GISAID      | EPI620450     | A/chicken/Iowa/14399-4/2015_H5N2                  |
| GISAID      | EPI894943     | A/chicken/Vietnam/NCVD14-A324/2014(H5N6)          |
| Genbank     | LC335983      | A/mute_swan/Shimane/3211A001/2017(H5N6)           |
| GISAID      | EPI1123351    | A/chicken/Korea/Gimje2/2017(H5N8)                 |
| GISAID      | EPI1123343    | A/chicken/Korea/Gunsan/2017(H5N8)                 |
| GISAID      | EPI1123317    | A/duck/Korea/HD1/2017(H5N6)                       |
| GISAID      | EPI1123335    | A/mallard/Korea/Jeju-H24/2017(H5N6)               |
| Genbank     | KJ508961      | A/baikal teal/Korea/H52/2014(H5N8)                |

\* We acknowledge the authors, originating and submitting laboratories of the sequences from GISAID's EpiFlu™ Database on which this research is based. Contact details of submitters can be found at: <http://platform.gisaid.org/epi3/frontend#326742>.

**Supplementary table S1. (B) NA sequence information of HxN6 viruses for phylogenetic analysis.**

| Data source | Accession No. | Taxname                                         |
|-------------|---------------|-------------------------------------------------|
| Genbank     | KP286103      | A/chicken/Dongguan/2690/2013(H5N6)              |
| Genbank     | KP284975      | A/chicken/Shenzhen/1395/2013(H5N6)              |
| Genbank     | KP285327      | A/goose/Shantou/1791/2014(H5N6)                 |
| GISAID*     | EPI596618     | A/duck/Vietnam/LBM759/2014(H5N6)                |
| GISAID      | EPI664220     | A/duck/Jiangxi/01.14NCJD034-P/2015(H5N6)        |
| Genbank     | KP090449      | A/duck/Jiangxi/NCDZT1126/2014(H5N6)             |
| GISAID      | EPI664580     | A/chicken/Yunnan/03.16DQXYL061-1-O/2015(H5N6)   |
| GISAID      | EPI661902     | A/chicken/Guangxi/04.10NM140/2015(H5N6)         |
| GISAID      | EPI664388     | A/duck/Guangdong/04.15SZBAXQ019/2015(H5N6)      |
| GISAID      | EPI658494     | A/chicken/Jiangxi/12.05NCNP006/2014(H5N6)       |
| GISAID      | EPI658502     | A/chicken/Hubei/03.06WHWTZ0115-O/2015(H5N6)     |
| GISAID      | EPI659094     | A/chicken/Yunnan/03.15DQJT0054-Z-P/2015(H5N6)   |
| GISAID      | EPI866095     | A/duck/Korea/ES2/2016(H5N6)                     |
| GISAID      | EPI866134     | A/mandarin duck/Korea/WB246/2016(H5N6)          |
| GISAID      | EPI866087     | A/chicken/Korea/HN1/2016(H5N6)                  |
| GISAID      | EPI661958     | A/duck/Guangdong/04.15SZBAXQ020/2015(H5N6)      |
| GISAID      | EPI664572     | A/environment/Yunnan/03.17DQJT0015-Z/2015(H5N6) |
| GISAID      | EPI657017     | A/duck/Hunan/02.26YYFQH297-P/2014(H5N6)         |
| GISAID      | EPI657377     | A/duck/Hunan/12.17YFGK0057/2014(H5N6)           |
| GISAID      | EPI664492     | A/duck/Jiangxi/04.01NCDZT0304-O/2015(H5N6)      |
| GISAID      | EPI664380     | A/environment/Jiangsu/12.30WZNHQ012/2014(H5N6)  |
| GISAID      | EPI658654     | A/duck/Hubei/03.06WHWTZ0125-O/2015(H5N6)        |
| GISAID      | EPI658654     | A/duck/Sichuan/04.27NBXJ79/2014(H5N6)           |
| GISAID      | EPI664588     | A/environment/Hunan/04.14YFGK394/2015(H5N6)     |
| GISAID      | EPI599355     | A/duck/Jiangxi/10160/2014(H5N6)                 |
| GISAID      | EPI658038     | A/environment/Jiangxi/05.07NCJD0010D/2015(H5N6) |
| GISAID      | EPI656537     | A/duck/Hunan/12.17YFQH012-O/2014(H5N6)          |
| Genbank     | LC010698      | A/duck/Vietnam/LBM360c1-4-1/2013(H5N6)          |
| GISAID      | EPI664532     | A/duck/Hubei/03.06WHWTZ0150-P/2015(H5N6)        |
| Genbank     | MF146256      | A/barnacle goose/Netherlands/2/2014(H3N6)       |
| Genbank     | KX518716      | A/duck/Moscow/4652/2011(H4N6)                   |
| Genbank     | KX530515      | A/duck/Moscow/4781/2012(H4N6)                   |
| Genbank     | KX978671      | A/mallard duck/Netherlands/19/2012(H4N6)        |
| Genbank     | KJ847705      | A/caspian seal/Russia/T1/2012(H4N6)             |
| Genbank     | KF259617      | A/duck/Yunnan/87/2007(H7N6)                     |
| Genbank     | MF147888      | A/mallard duck/Netherlands/7/2006(H10N6)        |
| Genbank     | KU160941      | A/duck/Henan/S1091/2010(H4N6)                   |
| Genbank     | FJ434371      | A/coot/Aktau/1454/2006(H4N6)                    |
| Genbank     | KF667698      | A/eurasian wigeon/Mongolia/340V/2009(H4N6)      |
| Genbank     | CY166034      | A/mallard/Sweden/104925/2009(H4N6)              |
| GISAID      | EPI760028     | A/duck/Guangdong/01.01 SZSGXJK005-Y/2016(H5N6)  |
| GISAID      | EPI660302     | A/goose/Guangdong/04.22 DGCP120-P/2015(H5N6)    |
| GISAID      | EPI599287     | A/chicken/Shenzhen/433/2013(H5N6)               |
| GISAID      | EPI590864     | A/duck/Sichuan/NCJPL7/2014(H5N6)                |
| GISAID      | EPI658950     | A/duck/Hunan/02.07 YFQH026-O/2015(H5N6)         |
| GISAID      | EPI585726     | A/cat/Sichuan/SC18/2014(H5N6)                   |
| GISAID      | EPI891534     | A/chicken/Miyazaki/2-2C/2017(H5N6)              |
| GISAID      | EPI867088     | A/muscovy duck/Aomori/1-3T/2016(H5N6)           |
| GISAID      | EPI881068     | A/chicken/Kumamoto/1-2C/2016(H5N6)              |
| GISAID      | EPI915872     | A/duck/Taiwan/1702004/2017(H5N6)                |
| GISAID      | EPI760091     | A/feline/Guangdong/1/2015(H5N6)                 |
| Genbank     | LC335985      | A/mute swan/Shimane/3211A001/2017(H5N6)         |
| GISAID      | EPI823917     | A/teal/Chary_Lake/106cloaca/2012(H4N6)          |
| Genbank     | AB545604      | A/duck/Vietnam/OIE-2454/2009(H4N6)              |
| Genbank     | LC121454      | A/duck/Mongolia/769/2015(H4N6)                  |
| GISAID      | EPI1123319    | A/duck/Korea/HD1/2017(H5N6)                     |
| GISAID      | EPI1123337    | A/mallard/Korea/Jeju-H24/2017(H5N6)             |
| GISAID      | EPI894945     | A/chicken/Vietnam/NCVD14-A324/2014(H5N6)        |

\* We acknowledge the authors, originating and submitting laboratories of the sequences from GISAID's EpiFlu™ Database on which this research is based. Contact details of submitters can be found at: <http://platform.gisaid.org/epi3/frontend#326742>.
